# Supplementary material for: Computational characterization of N-type characteristics and optoelectronic properties in air-stable pyromellitic diimide derivatives
Source: Royal Society of Chemistry journal article supplement (doi:10.1039/d0nj00811g), 2020-01-01
Supplement: d0nj00811g1.pdf [file d0nj00811g1.pdf]

## Supplimentary Information

*Rudranarayan Khatua<sup>1</sup>, Suryakanti Debata<sup>2</sup>, Sridhar Sahu<sup>\*</sup>*

<sup>1,2,\*</sup>High Performance Computing Lab, Department of Physics, Indian Institute of Technology (ISM ), Dhanbad, India-826004

sridharsahu@iitism.ac.in

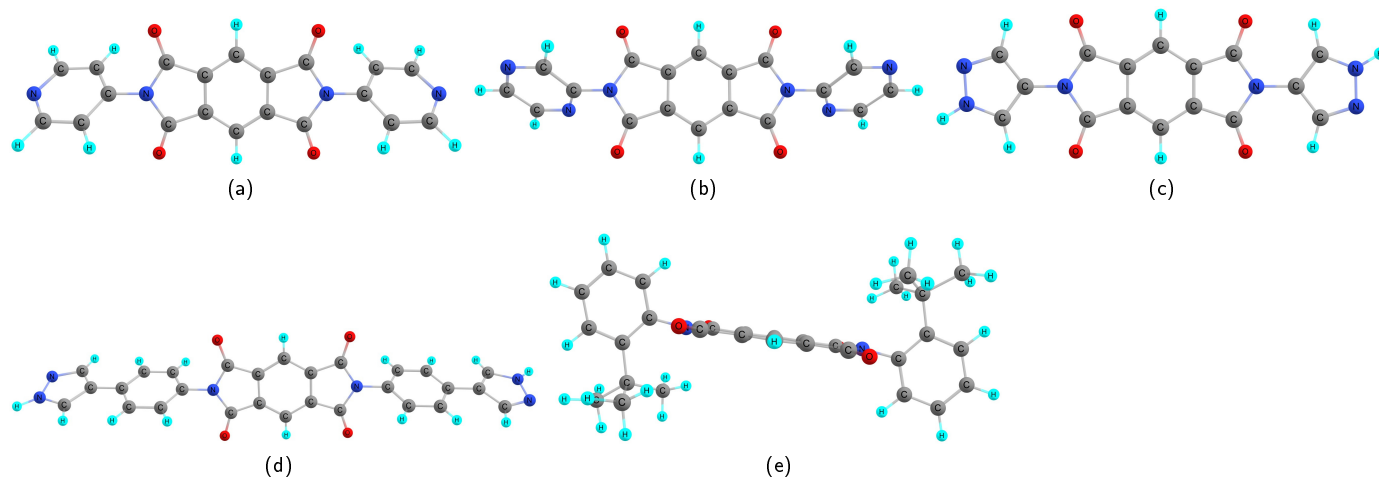

Figure S1: Optimized structures of pyromellitic diimide derivatives (a) BPyDI (b) BPyDI1 (c) BPIT (d) BPPIT and (e) BPPyDI.

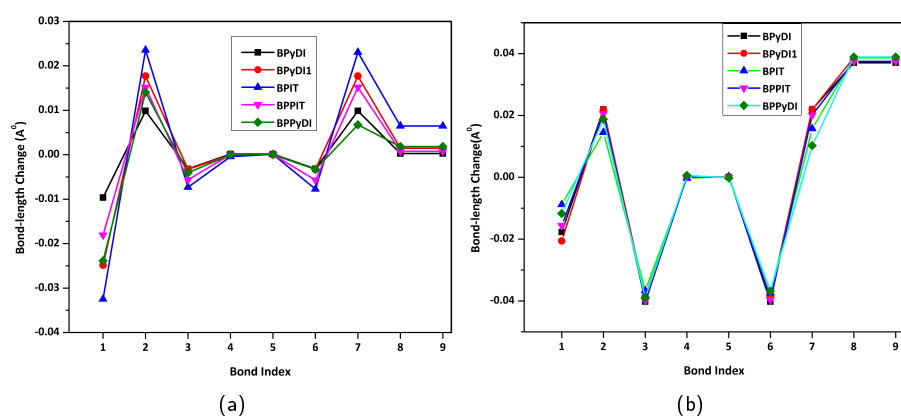

Figure S2: The change of bond length as a function of bond index of pyromellitic diimide derivatives; (a) oxidation (b) reduction.

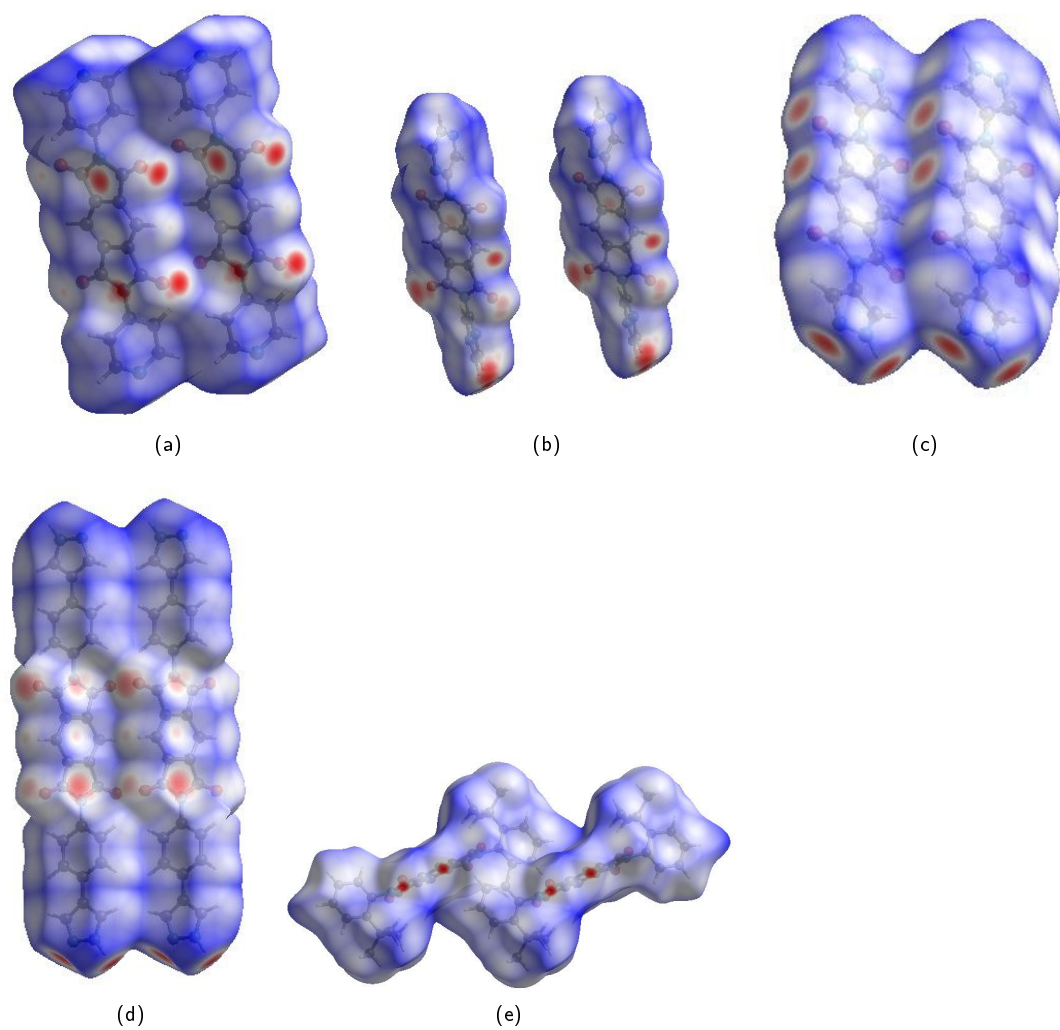

Figure S3: Hirshfeld Surface of the pyromellitic diimide derivatives; (a) BPyDI (b) BPyDI1 (c) BPIT (d) BBBIT and (e) BPPyDI.
